# Supplementary material for: Spatial separation and bidirectional trafficking of proteins using a multi-functional reporter
Source: PubMed Central journal article supplement (PMC2359743; doi:10.1186/1471-2121-9-17), 2008-04-02

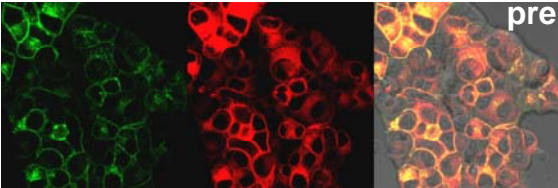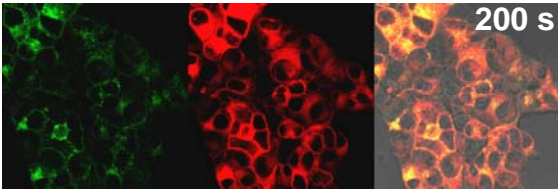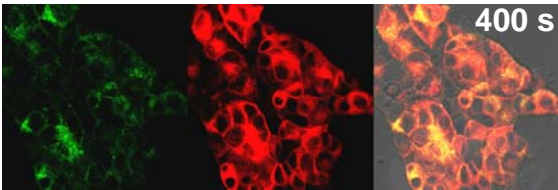

Supplement: 1471-2121-9-17-S1.pdf [file 1471-2121-9-17-S1.pdf]
